# Supplementary material for: DAAM mediates the assembly of long-lived, treadmilling stress fibers in collectively migrating epithelial cells in Drosophila
Source: eLife. 2021 Nov 23;10:e72881. doi: 10.7554/eLife.72881 (PMC8610420; doi:10.7554/eLife.72881)
Supplement: Figure 2—source data 1. — Each tab on the spreadsheet corresponds to one graph. [file elife-72881-fig2-data1.xlsx]

## Sheet: Figure 2D
SF half-life calculations
min.	% remaining	number remaining
0	100	112
2	100	112
4	99	111
6	98	110
8	99	111
10	97	109
12	96	107
14	95	106
16	89	100
18	88	98
20	85	95
22	80	90
24	80	90
26	78	87
28	76	85
30	74	83
32	66	74
34	58	65
36	49	55
38	45	50
40	40	45
42	36	40
44	29	32
46	23	26
48	21	24
50	16	18
52	14	16
54	13	15
56	13	14
58	12	13
60	10	11

## Sheet: Figure 2E
Sf lifetimes from cell migration speed
SF lifetime (cell lengths, µm)	SF lifetime (min.)	cell L (µm)	speed (µm/min)	observed SF appear?	observed SF disappear?	frame appeared	frame disappeared
1.82	60	9.90476	0.3	0	0	1	361
2.03	60	8.87619	0.3	0	0	1	361
2.03	60	8.87619	0.3	0	0	1	361
2.03	60	8.87619	0.3	0	0	1	361
1.41	60	12.7619	0.3	0	0	1	361
2.07	60	8.69524	0.3	0	0	1	361
2.07	60	8.69524	0.3	0	0	1	361
0.71	30.8333	8.88571	0.204	1	0	176	361
0.98	42.5	8.88571	0.204	1	0	106	361
1.27	55.1667	8.88571	0.204	0	1	1	332
0.93	42.1667	9.27619	0.204	0	1	1	254
0.99	44.8333	9.27619	0.204	0	1	1	270
1.18	35.3333	6.12381	0.204	0	1	1	213
1.25	48.6667	7.94286	0.204	1	0	69	361
1.07	41.6667	7.94286	0.204	1	0	111	361
0.75	33.6667	9.15238	0.204	0	1	1	203
0.79	35.3333	9.15238	0.204	0	1	1	213
2	45	6.9619	0.31	0	1	1	271
1.6	39.1667	7.6	0.31	1	0	126	361
1.2	33.5	8.64762	0.31	1	0	160	361
1.24	41	9.90476	0.3	0	1	1	247
1.55	51.1667	9.90476	0.3	0	1	1	308
1.46	48.3333	9.90476	0.3	0	1	1	291
1.49	48	9.69524	0.3	0	1	1	289
1.4	45.3333	9.69524	0.3	0	1	1	273
1.07	34.5	9.69524	0.3	0	1	1	208
1.13	36.6667	9.69524	0.3	1	0	141	361
1.65	48.8333	8.87619	0.3	0	1	1	294
1.46	43.3333	8.87619	0.3	1	0	101	361
1.4	41.3333	8.87619	0.3	0	1	1	249
1.09	46.1667	12.7619	0.3	0	1	1	278
1.4	59.6667	12.7619	0.3	0	1	1	359
1.33	56.5	12.7619	0.3	0	1	1	340
1.34	35.8333	8.04762	0.3	0	1	1	216
1.27	34.1667	8.04762	0.3	0	1	1	206
0.9	39.3333	8.88571	0.204	1	1	66	302
0.78	33.8333	8.88571	0.204	1	1	157	360
0.29	13	9.27619	0.204	1	1	169	247
0.2	9	9.27619	0.204	1	1	160	214
0.71	24	6.89524	0.204	1	1	132	276
0.94	31.6667	6.89524	0.204	1	1	106	296
1.11	33.3333	6.12381	0.204	1	1	104	304
0.1	4	7.94286	0.204	1	1	172	196
0.66	25.6667	7.94286	0.204	1	1	87	241
1.38	53.8333	7.94286	0.204	1	1	23	346
0.32	14.5	9.15238	0.204	1	1	166	253
0.35	15.8333	9.15238	0.204	1	1	151	246
0.4	17.8333	9.15238	0.204	1	1	164	271
0.69	30.8333	9.15238	0.204	1	1	23	208
1.4	33.3333	7.4	0.31	1	1	104	304
1.35	32.1667	7.4	0.31	1	1	101	294
0.6	14.3333	7.4	0.31	1	1	121	207
1.46	30.1667	6.41905	0.31	1	1	28	209
1.5	31	6.41905	0.31	1	1	106	292
1.82	37.6667	6.41905	0.31	1	0	135	361
1.27	26.3333	6.41905	0.31	1	1	164	322
1.44	32.3333	6.9619	0.31	1	1	54	248
0.84	18.8333	6.9619	0.31	1	1	100	213
0.76	17.1667	6.9619	0.31	1	1	159	262
1.56	35	6.9619	0.31	1	1	38	248
0.72	18.5	7.99048	0.31	1	1	129	240
1.8	46.3333	7.99048	0.31	1	1	82	360
1.13	29	7.99048	0.31	1	1	38	212
1.17	20.1667	5.35238	0.31	1	1	82	203
0.61	10.5	5.35238	0.31	1	1	135	198
0.73	12.6667	5.34286	0.31	1	1	137	213
2.04	35.1667	5.34286	0.31	1	1	85	296
1.66	28.6667	5.34286	0.31	1	1	61	233
1.25	21.5	5.34286	0.31	1	1	102	231
1.71	31.1667	5.65714	0.31	1	1	34	221
0.61	11.1667	5.65714	0.31	1	1	134	201
2.21	40.3333	5.65714	0.31	1	1	42	284
1.45	35.5	7.6	0.31	1	1	58	271
0.88	21.6667	7.6	0.31	1	1	141	271
1.56	38.3333	7.6	0.31	1	1	72	302
1.12	31.1667	8.64762	0.31	1	1	119	306
1.41	39.3333	8.64762	0.31	1	1	84	320
1.55	43.1667	8.64762	0.31	1	1	89	348
0.55	15.3333	8.64762	0.31	1	1	105	197
0.18	3.33333	5.59048	0.31	1	1	178	198
1.06	34.8333	9.90476	0.3	1	1	125	334
0.94	27.6667	8.87619	0.3	1	1	115	281
1.08	32	8.87619	0.3	1	1	109	301
0.61	18	8.87619	0.3	1	1	83	191
0.71	30.3333	12.7619	0.3	1	1	70	252
0.58	24.5	12.7619	0.3	1	1	118	265
1.13	48	12.7619	0.3	1	1	72	360
0.8	21.3333	8.04762	0.3	1	1	87	215
1.6	42.8333	8.04762	0.3	1	1	16	273
0.52	14	8.04762	0.3	1	1	89	173
0.76	20.3333	8.04762	0.3	1	1	85	207
# appearances	64
# disappearances	75
