# Supplementary material for: DAAM mediates the assembly of long-lived, treadmilling stress fibers in collectively migrating epithelial cells in Drosophila
Source: eLife. 2021 Nov 23;10:e72881. doi: 10.7554/eLife.72881 (PMC8610420; doi:10.7554/eLife.72881)
Supplement: Figure 3—source data 1. — Each tab on the spreadsheet corresponds to one graph. [file elife-72881-fig3-data1.xlsx]

## Sheet: Figure 3F source data
Count of adhesions on individual SFs
# adhesions/SF
5
5
4
6
4
5
5
5
3
3
4
5
4
4
6
5
5
5
5
5
7
3
5
6
3
5
5
5
4
2
4
3
6
4
4
5
4
4
6
3.2
7
3
3
3
4
5
5
3
6
3
5
3
4
3
7
6
5
4
4
7
5
7
5
7
5
5
5
6
6
6
7
7
7
5
6
10
4
8
8
7
5
4
6
5
4
4
6

## Sheet: Figure 3G source data
Linear density of adhesions on individual SFs
Adh density (#/um)	SF length (um)	# adhesions/SF
1.16279	4.3	5
0.724638	6.9	5
0.816327	4.9	4
1.01695	5.9	6
1.25	3.2	4
1.19048	4.2	5
1.04167	4.8	5
1.16279	4.3	5
0.967742	3.1	3
0.9375	3.2	3
0.952381	4.2	4
1.47059	3.4	5
0.8	5	4
1.17647	3.4	4
1.13208	5.3	6
1.35135	3.7	5
1.16279	4.3	5
1.21951	4.1	5
1.08696	4.6	5
0.847458	5.9	5
1.32075	5.3	7
0.833333	3.6	3
1.21951	4.1	5
1.39535	4.3	6
0.9375	3.2	3
0.943396	5.3	5
1.28205	3.9	5
1.47059	3.4	5
1.11111	3.6	4
0.350877	5.7	2
1.17647	3.4	4
0.461538	6.5	3
1.2766	4.7	6
0.727273	5.5	4
0.784314	5.1	4
1.38889	3.6	5
1.14286	3.5	4
1.08108	3.7	4
1.22449	4.9	6
0.8	4	3.2
1.2069	5.8	7
0.508475	5.9	3
0.833333	3.6	3
0.612245	4.9	3
0.769231	5.2	4
1.66667	3	5
1.38889	3.6	5
1.25	2.4	3
1.39535	4.3	6
0.810811	3.7	3
1.02041	4.9	5
1.2	2.5	3
1.11111	3.6	4
1.25	2.4	3
1.25	5.6	7
1.5	4	6
1.25	4	5
1.21212	3.3	4
1.17647	3.4	4
1.09375	6.4	7
0.769231	6.5	5
1.02941	6.8	7
1.08696	4.6	5
1.09375	6.4	7
1.25	4	5
0.833333	6	5
0.909091	5.5	5
1.15385	5.2	6
1.2	5	6
0.967742	6.2	6
1.12903	6.2	7
1.02941	6.8	7
1.06061	6.6	7
0.892857	5.6	5
0.923077	6.5	6
0.980392	10.2	10
0.666667	6	4
1.37931	5.8	8
1.17647	6.8	8
1.12903	6.2	7
1.02041	4.9	5
0.8	5	4
0.882353	6.8	6
0.943396	5.3	5
0.615385	6.5	4
0.645161	6.2	4
1.30435	4.6	6
