# Supplementary material for: DAAM mediates the assembly of long-lived, treadmilling stress fibers in collectively migrating epithelial cells in Drosophila
Source: eLife. 2021 Nov 23;10:e72881. doi: 10.7554/eLife.72881 (PMC8610420; doi:10.7554/eLife.72881)
Supplement: Figure 4—source data 1. [file elife-72881-fig4-data1.xlsx]

## Sheet: Figure 4E
Adhesion lifetimes
Stationary adhesion (min.)	Sliding adhesion (min.)
27.8333	4
20	4.5
9	4.5
19.5	5
15.5	7
28.5	6.83333
16	7.33333
12.8333	7.67
19.3333	8
16.6667	10
18.8333	10
19.8333	11
18.5	12.8333
5.5	13.1667
18.3333	14
3.5	14.33
5.16667	14.5
15	16
8.66667	17
8	17.17
11.8333	19
3.33333	20
3.5	20
10.8333	21.67
4.33333	22.5
8.33333	23.5
14.1667	25.67
5.66667	26
1.66667	27.1667
12.8333	27.17
24.5	27.83
4.66667	28.3333
7.66667	29.1667
18	29.33
22	30.8333
15.3333	31
8.33333	31.5
17.6667	32
7.16667	32.5
19	33
15.5	33.5
20.5	33.83
10.1667	34
18.6667	34.5
22.3333	35.33
2.5	36
15.3333	35.8333
18.1667	36.83
12.8333	39
26.1667	40
21.8333	40
23.6667	41
15.3333	41.5
24.3333	41.67
7.33333	42.6667
4	43
11.3333	44.1667
3.66667	44.17
17	46.17
16.1667	46.3333
14.8333	46.3333
14.6667	46.83
12.6667	48
17.5	51.5
10	52
8.33333	53
13.8333	53.17
13	53.17
7.5	54
9.66667	54.5
6.16667	58.83
16.6667	60
16.3333	60
4.66667	60
9.16667	60
6.5	60
12.1667	60
6.33333	60
10.6667	60
14.3333	60
12.5	60
3.5	60
9.5	60
12.5	60
18.5
19.1667
13.1667
5.16667
10
3.66667
6.16667
4.16667
1.66667
12.6667
10
7.66667
9.83333
13
15
8.33333
9.16667
5.33333
15.1667
13.6667
15.8333
9.16667
11.1667
15.3333
31
13
30.5
29.1667
36.5
22.8333
8.5
37
23.8333
13.6667
19.6667
9.66667
4.16667
22.5
20.8333
1.5
8.33333
16
16.6667
18.3333
15.5
18.5
22.5
24.1667
18.3333
11
