# Supplementary material for: DAAM mediates the assembly of long-lived, treadmilling stress fibers in collectively migrating epithelial cells in Drosophila
Source: eLife. 2021 Nov 23;10:e72881. doi: 10.7554/eLife.72881 (PMC8610420; doi:10.7554/eLife.72881)
Supplement: Figure 6—source data 1. — Each tab on the spreadsheet corresponds to one graph. [file elife-72881-fig6-data1.xlsx]

## Sheet: Figure 6D source data
SF F-actin levels in control and manipulations to Abi and DAAM.
Abi RNAi/control brightness ratio	Abi RNAi (16-bit SF brightness)	Control for Abi RNAi (16-bit SF brightness)		DAAM RNAi/control brightness ratio	DAAM RNAi (8- and 16-bit SF brightness)	Control for DAAM RNAi (8- and 16-bit SF brightness)		DAAM^A/control brightness ratio	DAAM^A (16-bit SF brightness)	Control for DAAM^A (16-bit SF brightness)		DAAM^Ex68/control brightness ratio	DAAM^Ex68 (16-bit SF brightness)	Control for DAAM^Ex68 (16-bit SF brightness)		CDAAM/control brightness ratio	CDAAM (16-bit SF brightness)	Control for CDAAM (16-bit SF brightness)
0.895456	8000	8934		0.564103	44	78		0.703808	6026	8562		0.728988	7919	10863		2.18036	19765	9065
1.26871	12276	9676		0.689189	51	74		0.751993	7074	9407		0.783587	11286	14403		2.47473	30699	12405
1.13269	8579	7574		0.596774	37	62		0.654787	4391	6706		0.746316	7699	10316		2.58888	20768	8022
0.84171	3366	3999		0.492063	31	63		0.742071	4609	6211		0.715668	8359	11680		2.71504	28888	10640
1.0304	6508	6316		0.653061	32	49		0.648078	6171	9522		0.611888	4900	8008		1.71203	9738	5688
1.14766	17060	14865		0.711111	32	45		0.811415	4066	5011		0.721448	10303	14281		1.91415	7737	4042
1.19232	11587	9718		0.641791	43	67		0.561806	9658	17191		0.768119	7705	10031		2.25193	12818	5692
				0.777575	3835	4932		0.663781	8894	13399		0.59706	6579	11019		2.12325	7890	3716
				0.887178	5646	6364		0.728914	6983	9580		0.910252	7272	7989		2.57084	5008	1948
				0.790701	4847	6130		0.634802	9722	15315		0.950704	5805	6106		2.45342	8506	3467
				0.630902	3728	5909		0.795807	5125	6440
				0.754088	3551	4709		0.808824	5445	6732
				0.784949	5424	6910		0.665376	7045	10588
								0.742062	8320	11212
								0.628145	6691	10652
								0.742547	12803	17242
								0.673835	16544	24552

## Sheet: Figure 6D statistics
Test	Abi RNAi		DAAM RNAi				DAAM^A		DAAM^Ex68		CDAAM
p-value (two-tailed Wilcoxon matched pairs signed ranks test, controls vs. experimental)	0.1562		0.0002	(8-bit and 16-bit DAAM RNAi data pooled)			<0.0001		0.002		0.002
Shapiro-Wilks test of normality	Abi RNAi	Controls for Abi RNAi	DAAM RNAi (8-bit)	Controls for DAAM RNAi (8-bit)	DAAM RNAi (16-bit)	Controls for DAAM RNAi (16-bit)	DAAM^A	Controls for DAAM^A	DAAM^Ex68	Controls for DAAM^Ex68	CDAAM	Controls for CDAAM
W	0.9796	0.9491	0.8909	0.9436	0.8654	0.9343	0.8909	0.9436	0.9542	0.95	0.8724	0.9431
P value	0.9575	0.7216	0.2792	0.671	0.2085	0.6133	0.2792	0.671	0.7184	0.6689	0.1065	0.5877
Passed normality test (alpha=0.05)?	Yes	Yes	Yes	Yes	Yes	Yes	Yes	Yes	Yes	Yes	Yes	Yes
P value summary	ns	ns	ns	ns	ns	ns	ns	ns	ns	ns	ns	ns
Ratio paired t-test (two-tailed)
P value	0.3339		<0.0001	(8-bit and 16-bit DAAM RNAi data pooled)			<0.0001		0.0001		<0.0001
t, df	t=1.051, df=6		t=8.552, df=12				t=14.56, df=16		t=6.310, df=9		t=17.77, df=9
Geometric mean of ratios (B / A)	0.9413		1.466				1.428		1.34		0.4392
SD of log(ratios)	0.06616		0.07003				0.04385		0.06375		0.0636
SEM of log(ratios)	0.02501		0.01942				0.01064		0.02016		0.02011
95% confidence interval	0.8176 to 1.084		1.330 to 1.616				1.356 to 1.505		1.207 to 1.489		0.3955 to 0.4877
R squared (partial eta squared)	0.1554		0.859				0.9298		0.8156		0.9723

## Sheet: Fig6-S1C source data
SF F-actin levels in Sra1 RNAi and Ena RNAi
Sra1 RNAi/control brightness ratio	Sra1 RNAi (16-bit SF brightness)	Control for Sra1 RNAi (16-bit SF brightness)		Ena RNAi/control brightness ratio	Ena RNAi (16-bit SF brightness)	Control for Ena RNAi (16-bit SF brightness)
1.6793	11693	6963		0.896633	14434	16098
1.0812	14354	13276		0.93644	11536	12319
1.14031	11589	10163		0.977035	7275	7446
1.44492	7791	5392		1.07976	7554	6996
1.16642	11936	10233		1.10275	4776	4331
1.33396	14144	10603		0.960823	5788	6024

## Sheet: Fig6-S1C-statistics
Test	Sra1 RNAi	Comments	Ena RNAi	Comments
p-value (two-tailed Wilcoxon matched pairs signed ranks test, control vs. experimental)	0.0312	Experimental cells’ SFs significantly BRIGHTER than controls, opposite what sought	0.5625
Shapiro-Wilks test of normality	Srai RNAi	Controls for Sra1 RNAi	Ena RNAi	Controls for Ena RNAi
W	0.8756	0.9354	0.9054	0.8929
P value	0.2493	0.6227	0.4068	0.3338
Passed normality test (alpha=0.05)?	Yes	Yes	Yes	Yes
P value summary	ns	ns	ns	ns
Ratio paired t-test		Ratio paired t-test
P value	0.0133	P value	0.7633
t, df	t=3.751, df=5	t, df	t=0.3181, df=5
Geometric mean of ratios (B / A)	0.7739	Geometric mean of ratios (B / A)	1.011
SD of log(ratios)	0.07269	SD of log(ratios)	0.03536
SEM of log(ratios)	0.02967	SEM of log(ratios)	0.01443
95% confidence interval	0.6492 to 0.9225	95% confidence interval	0.9279 to 1.101
R squared (partial eta squared)	0.7378	R squared (partial eta squared)	0.01984

## Sheet: Fig6-S1D-source data
SF F-actin levels in controls and RNAi against various formins
Fhos GD10435 /control	Fhos GD10435	control for Fhos GD10435		Fhos GD2374 /control	Fhos GD2374	control for Fhos GD2374		Frl GD10799/control	Frl GD10799	control for Frl GD10799		Frl KK101703/control	Frl KK101703	control for Frl KK101703		Dia GD9442/control	Dia GD9442	control for Dia GD9442		Dia KK101745/control	Dia KK101745	control for Dia KK101745		Capu KK101400/control	Capu KK101400	control for Capu KK101400		form3 KK110697/control	form3 KK110697	control for form3 KK110697		form3 GD12856/control	form3 GD12856		control for form3 GD12856	DAAM KK102786/control	DAAM KK102786	control for DAAM KK102786
1.013	77	76		0.813	87	107		0.979	47	48		1	52	52		0.943	33	35		1.02	50	49		0.929	52	56		1.015	69	68		1.081	40		37	0.564	44	78
1.037	84	81		0.984	61	62		0.959	70	73		0.882	67	76		0.932	82	88		0.963	77	80		1.099	89	81		0.935	43	46		0.895	85		95	0.689	51	74
1.059	107	101		1.016	63	62		1.088	124	114		1.231	48	39		1.057	111	105		1.156	52	45		0.958	23	24		1.064	50	47		1.059	72		68	0.597	37	62
0.986	72	73						0.879	58	66						1.314	46	35		0.875	49	56						0.848	39	46		0.95	38		40	0.492	31	63
1.081	80	74						0.957	66	69						0.795	70	88		0.963	52	54						0.8	28	35		0.923	48		52	0.653	32	49
1.06	53	50														0.514	54	105		0.825	52	63										1.061	52		49	0.711	32	45
																1.086	63	58		0.978	44	45										1.098	45		41	0.642	43	67
																				1.107	62	56										1.052	61		58
																																1.057	92		87

## Sheet: Fig6-S1D-statistics
Test	Fhos GD10435	Comments	Fhos GD2374		Frl GD10799		Frl KK101703		Dia GD9442		Dia KK101745		Capu KK101400		form3 KK110697		form3 GD12856		DAAM KK102786
p-value (two-tailed Wilcoxon matched pairs signed ranks test, controls vs. experimental)	0.0938	trend is towards being higher than controls	0.75		0.625		>0.9999		0.5234		0.625		>0.9999		0.375		0.5		0.0156
Shapiro-Wilks test of normality	Fhos GD10435	Control for Fhos GD10435	Fhos GD2374	control for Fhos GD2374	Frl GD10799	control for Frl GD10799	Frl KK101703	control for Frl KK101703	Dia GD9442	control for Dia GD9442	Dia KK101745	control for Dia KK101745	Capu KK101400	control for Capu KK101400	form3 KK110697	control for form3 KK110697	form3 GD12856	control for form3 GD12856	DAAM KK102786	control for DAAM KK102786
W	0.9262	0.9559	0.8073	0.75	0.8213	0.8771	0.8995	0.9714	0.9689	0.8503	0.8048	0.865	0.9951	0.995	0.965	0.8519	0.9034	0.8885	0.8909	0.9436
P value	0.551	0.7879	0.1321	—	0.1196	0.2966	0.3839	0.6753	0.8907	0.1236	0.0322	0.1345	0.8666	0.8648	0.842	0.2005	0.2724	0.1924	0.2792	0.671
Passed normality test (alpha=0.05)?	Yes	Yes	Yes	—	Yes	Yes	Yes	Yes	Yes	Yes	No	Yes	Yes	Yes	Yes	Yes	Yes	Yes	Yes	Yes
P value summary	ns	ns	ns	—	ns	ns	ns	ns	ns	ns	*	ns	ns	ns	ns	ns	ns	ns	ns	ns
Ratio paired t-test
P value	0.0391	slightly significantly higher than controls, not lower	0.4254		0.4217		0.806		0.6325		0.4678		0.8979		0.2281		0.5248		<0.0001
t, df	t=2.775, df=5		t=0.9929, df=2		t=0.8944, df=4		t=0.2796, df=2		t=0.4999, df=7		t=0.7749, df=6		t=0.1451, df=2		t=1.422, df=4		t=0.6650, df=8		t=10.02, df=6
Geometric mean of ratios (B / A)	1.039		0.9333		0.9699		1.028		0.9805		0.9163		0.9925		0.927		1.017		0.617
SD of log(ratios)	0.01467		0.05232		0.03314		0.07318		0.04831		0.1296		0.03885		0.05179		0.03296		0.05537
SEM of log(ratios)	0.005988		0.03021		0.01482		0.04225		0.01708		0.04898		0.02243		0.02316		0.01099		0.02093
95% confidence interval	1.003 to 1.076		0.6919 to 1.259		0.8823 to 1.066		0.6761 to 1.562		0.8935 to 1.076		0.6953 to 1.208		0.7948 to 1.240		0.7994 to 1.075		0.9593 to 1.078		0.5483 to 0.6942
R squared (partial eta squared)	0.6064		0.3302		0.1667		0.03762		0.03447		0.09097		0.01041		0.3358		0.05238		0.9436

## Sheet: Fig6-S1E-source data
SF F-actin levels in DAAM mutant clones that are within epithelia that also express RNAi against various formins
DAAMA & TJ>no RNAi/control	control TJ>no RNAi	DAAMA & TJ>no RNAi	DAAMA & TJ>FHOS GD2374/control	control TJ>FHOS GD2374	DAAMA & TJ>FHOS GD2374	DAAMA & TJ>Frl KK101703/control	control TJ>Frl KK101703	DAAMA & TJ>Frl KK101703	DAAMA & TJ>form3 KK110697/control	Control TJ>form3 KK110697	DAAMA & TJ>form3 KK110697	DAAMA & TJ>Capu GD879/control	Control TJ>Capu GD879	DAAMA & TJ>Capu GD879	DAAMA & TJ>Capu KK101400/control	Control TJ>Capu KK101400	DAAMA & TJ>Capu KK101400	DAAMA & TJ>Dia KK101745/control	Control TJ>Dia KK101745	DAAMA & TJ>Dia KK101745
0.703808	8562	6026	0.640435	7993	5119	0.701676	8474	5946	0.651576	10183	6635	0.735922	10406	7658	0.655253	15916	10429	0.671209	9246	6206
0.751993	9407	7074	0.835544	3016	2520	0.666478	3535	2356	0.872264	8909	7771	0.544079	11298	6147	0.552136	9456	5221	0.846501	10189	8625
0.654787	6706	4391	0.664699	7793	5180	0.666183	4820	3211	0.641397	14141	9070	0.704667	9193	6478	0.630133	9644	6077	0.619576	11708	7254
0.742071	6211	4609	0.48143	9316	4485	0.574916	14830	8526	0.565376	7388	4177	0.616771	9099	5612	0.664981	8501	5653	0.692995	9736	6747
0.648078	9522	6171	0.580422	15773	9155	0.589039	6222	3665	0.751272	4913	3691	0.526153	19424	10220	0.858375	6842	5873	0.674886	8517	5748
0.811415	5011	4066	0.633846	10542	6682	0.650819	5679	3696	0.802876	9598	7706	0.486696	24954	12145	0.882064	4689	4136	0.704569	8733	6153
0.561806	17191	9658	0.660481	6736	4449	0.618386	9714	6007	0.685153	8096	5547	0.625974	11034	6907	0.711435	14631	10409	0.541728	17099	9263
0.663781	13399	8894	0.720956	8952	6454	0.731088	3503	2561	0.603105	7536	4545	0.691763	13707	9482	0.897709	6677	5994	0.728487	13248	9651
0.728914	9580	6983	0.673274	13822	9306	0.420673	7343	3089	0.658285	9306	6126	0.61306	9663	5924	0.47081	10894	5129
0.634802	15315	9722	0.741478	5075	3763	0.738499	8543	6309	0.53052	9502	5041	0.828244	13164	10903	0.850877	4332	3686

## Sheet: Fig6-S1E-statistiscs
Test	DAAMA & TJ>FHOS GD2374	DAAMA & TJ>Frl KK101703	DAAMA & TJ>fForm3 KK110697	DAAMA & TJ>Capu GD879	DAAMA & TJ>Capu KK101400	DAAMA & TJ>Dia KK101745
p-value (two-tailed Mann-Whitney, compared to control DAAM^A, TJ>no RNAi)	0.5288	0.2709	0.6305	0.1655	0.6987	0.8968
