# Supplementary material for: DAAM mediates the assembly of long-lived, treadmilling stress fibers in collectively migrating epithelial cells in Drosophila
Source: eLife. 2021 Nov 23;10:e72881. doi: 10.7554/eLife.72881 (PMC8610420; doi:10.7554/eLife.72881)
Supplement: Figure 7—source data 1. — Each tab on the spreadsheet corresponds to one graph. [file elife-72881-fig7-data1.xlsx]

## Sheet: Figure 7D source data
Lateral SF density in control and DAAM^A cells
Control SFs/µm	Control SFs/cell	cell W (µm)		DAAM^A SFs/µm	Control SFs/cell	cell W (µm)
0.97	7	7.2		1.11	6	5.4
0.68	4	5.9		1.45	8	5.5
1.23	7	5.7		1.58	6	3.8
1.45	10	6.9		0.91	5	5.5
1.36	8	5.9		1.3	6	4.6
1.04	5	4.8		1.25	5	4
1	4	4		1.22	6	4.9
1.02	5	4.9		1.25	6	4.8
1.21	8	6.6		1.25	7	5.6
1.09	7	6.4		1.34	9	6.7
1.4	7	5		1.36	9	6.6
1.19	10	8.4		1.05	6	5.7
1.38	9	6.5		1.36	8	5.9
1.23	7	5.7		1.16	5	4.3
1.15	6	5.2		1.64	9	5.5
1.49	10	6.7		1.25	7	5.6
1.18	6	5.1		1.13	8	7.1
1.31	8	6.1		1.32	9	6.8
1.36	11	8.1		1.52	7	4.6
1.08	10	9.3		1.09	6	5.5
1.21	8	6.6		1.28	5	3.9
1.11	5	4.5		1.2	6	5
1.4	6	4.3		1.22	6	4.9
1.15	6	5.2		0.91	4	4.4
1.07	6	5.6		1.69	10	5.9
1.55	11	7.1		1.36	6	4.4
1.27	9	7.1		1.27	8	6.3
1.15	6	5.2		1.22	6	4.9
1.3	7	5.4		1.18	4	3.4
1.18	4	3.4		1.03	4	3.9
1.23	7	5.7		1.48	8	5.4
1.49	10	6.7		1.33	6	4.5
1.41	9	6.4		0.83	5	6
1.33	6	4.5		1.13	7	6.2
1.36	11	8.1		1.19	5	4.2
1.41	9	6.4		1.71	6	3.5
0.79	3	3.8		1.46	6	4.1
1.27	9	7.1		1.36	6	4.4
1.06	5	4.7		1.64	9	5.5
1.04	5	4.8		1.11	6	5.4
1.67	9	5.4		1.16	8	6.9
1.3	10	7.7		1.02	9	8.8
1.01	7	6.9		1.23	10	8.1
0.87	9	10.3		1.13	8	7.1
1.11	11	9.9		1.15	10	8.7
1.25	10	8		1.06	9	8.5
1.34	11	8.2		1.22	9	7.4
1.25	11	8.8		1	6	6
1.17	9	7.7		1.3	12	9.2
0.9	7	7.8		1.1	8	7.3
1.07	11	10.3		1.11	8	7.2
0.71	6	8.5		1.27	8	6.3
1.22	10	8.2		1.04	10	9.6
1.03	6	5.8		1.19	8	6.7
0.99	9	9.1		1	9	9
1.17	12	10.3		1.25	12	9.6
1.2	9	7.5		0.7	4	5.7
1.32	10	7.6		0.72	5	6.9
1.34	9	6.7		1.03	6	5.8
1.37	10	7.3		1.59	11	6.9
1.76	12	6.8		1.72	11	6.4
0.86	5	5.8		1.02	6	5.9
1.13	6	5.3		1.36	8	5.9
1.27	9	7.1		1.3	10	7.7
1.3	6	4.6		1.33	6	4.5
1.02	6	5.9		1.69	11	6.5
1.45	9	6.2		1.55	9	5.8
0.95	6	6.3		0.93	4	4.3
1.08	8	7.4		1.19	7	5.9
1.17	7	6		1.23	7	5.7
1.14	9	7.9		1.09	6	5.5
1.23	10	8.1		0.98	5	5.1
1.06	11	10.4		1.05	6	5.7
1.03	9	8.7		1.41	9	6.4
1.39	11	7.9		1.5	6	4
0.98	6	6.1		1.19	12	10.1
0.7	4	5.7		1.28	10	7.8
1.22	9	7.4		1.17	11	9.4
0.76	7	9.2		1.18	8	6.8
1.07	8	7.5		1.27	9	7.1
1.25	8	6.4		0.92	6	6.5
1.64	11	6.7		1.32	7	5.3
1	5	5		1.21	7	5.8
1.15	6	5.2		1.31	8	6.1
1.29	9	7		1.33	6	4.5
1.67	11	6.6		0.98	6	6.1
1	8	8		1.37	7	5.1
1.09	10	9.2		1.05	9	8.6
0.91	6	6.6		1.53	11	7.2
1.18	9	7.6		1.19	10	8.4

## Sheet: Figure 7D statistics
Test
p-value (two-tailed Mann-Whitney test)	0.1584

## Sheet: Figure 7E source data
MRLC levels at basal surface, control & DAAM RNAi cells
Control	DAAM RNAi
8159	4288
7457	5704
6682	5693
11555	6013
8934	3634
10202	6185
8735	6825

## Sheet: Figure 7E statistics
Test
p-value (two-tailed Mann-Whitney test)	0.0012

## Sheet: Figure 7F source data
Talin levels at basal surface in DAAM RNAi and CDAAM overexpressing cells
Ratio Talin brightness DAAM RNAi/control	Control for DAAM RNAi Talin brightness	DAAM RNAi Talin Brightness		Ratio Talin brightness CDAAM/control	Control for CDAAM Talin brightness	CDAAM Talin brightness
0.890236	7507	6683		1.06044	3151.9	3342.4
0.900967	5897	5313		1.03479	2719	2813.6
0.975397	8698	8484		1.239	2073	2568
0.961595	9478	9114		1.30021	2798	3638
0.925698	7308	6765		1.04367	3059.2	3192.8
1.01368	8113	8224		0.99217	1788	1774
0.969563	6998	6785		1.10282	2947	3250
				1.25786	2734	3439
				1.12135	3255	3650
				0.976832	3194	3120
				0.982982	3467	3408
				1.10854	3280	3636
				0.992147	3311	3285
				0.983649	3058	3008

## Sheet: FIgure 7F statistics
Test	DAAM RNAi Talin Brightness		CDAAM Talin brightness
p-value (two-tailed Wilcoxon matched pairs signed ranks test, experimental vs. control cells)	0.0312		0.0166
	Control for DAAM RNAi Talin brightness	DAAM RNAi Talin Brightness	Control for CDAAM Talin brightness	CDAAM Talin brightness
Shapiro-Wilks test of normality
W	0.9902	0.9346	0.8551	0.8404
P value	0.9936	0.5905	0.0261	0.0165
Passed normality test (alpha=0.05)?	Yes	Yes	No	No
P value summary	ns	ns	*	*
Ratio paired t-test (two-tailed)
P value	0.0221		0.011
t, df	t=3.066, df=6		t=2.963, df=13
Geometric mean of ratios (B / A)	0.9473		1.081
SD of log(ratios)	0.0203		0.04248
SEM of log(ratios)	0.007674		0.01135
95% confidence interval	0.9072 to 0.9891		1.021 to 1.143
R squared (partial eta squared)	0.6103		0.4031

## Sheet: Figure 7G source data
Migration rates for control and DAAM RNAi epithelia
control (µm/min)	DAAM RNAi (µm/min)
0.230868	0.267949
0.305731	0.36397
0.383864	0.624869
0.404026	0.286745
0.158384	0.487733
0.230868	0.32492
0.509525	0.383864
0.286745	0.212557
0.286745	0.383864
0.286745	0.781286
0.19438	0.554309
0.158384	0.122785
0.487733	0.649408
0.466308	0.509525
0.286745	0.726543
0.344328	0.600861
0.424475	0.624869
0.19438	0.649408
0.383864	0.554309
0.176327	0.509525
0.424475	0.19438
0.286745	0.726543
0.57735	0.487733
0.509525
0.230868
0.466308
0.305731

## Sheet: Figure 7G statistics
Test
p-value (two-tailed Mann-Whitney test)	0.0036
