# Supplementary material for: DAAM mediates the assembly of long-lived, treadmilling stress fibers in collectively migrating epithelial cells in Drosophila
Source: eLife. 2021 Nov 23;10:e72881. doi: 10.7554/eLife.72881 (PMC8610420; doi:10.7554/eLife.72881)
Supplement: Figure 8—source data 1. — Each tab on the spreadsheet corresponds to one graph. [file elife-72881-fig8-data1.xlsx]

## Sheet: Figure 8A source data
DAAM-GFP levels at basal surface by stage
stage 5	stage 6-7	stage 8	stage 10	stage 11-12	migratory	non-migratory
19723	15844	18484	8477	11656	19723	8477
17299	12938	13948	7030	11717	17299	7030
13757	13875	14403	6851	9875	13757	6851
15783	16520	14990	6941	6729	15783	6941
14794	12558	14604	9374	9351	14794	9374
16082	17797	21039	6954	9375	16082	6954
18323	15033	19181		10226	18323	11656
16808	13734			10537	16808	11717
13460	20356			9149	13460	9875
15026					15026	6729
16689					16689	9351
18764					18764	9375
					15844	10226
					12938	10537
					13875	9149
					16520
					12558
					17797
					15033
					13734
					20356
					18484
					13948
					14403
					14990
					14604
					21039
					19181

## Sheet: FIgure 8A statistics
Test	migrating vs. post-migration
p-value (two-tailed Mann-Whitney test)	<0.0001

## Sheet: Figure 8B source data
SF F-actin levels in control and DAAM RNAi epithelia, by stage.
exp/con stage 5	stage 5 con	stage 5 exp	exp/con stage 6-7	stage 6-7 con	stage 6-7 exp	exp/con stage 8	stage 8 con	stage 8 exp	exp/con stage 10	stage 10 con	stage 10 exp	exp/con stage 12	stage 12 con	stage 12 exp	treadmilling pooled	canonical pooled
0.537768	10538	5667	0.703808	8562	6026	0.811415	5011	4066	0.913166	5666	5174	1.10665	13783	15253	0.538	0.913
0.662665	12077	8003	0.751993	9407	7074	0.561806	17191	9658	1.05909	13099	13873	0.932333	15458	14412	0.663	1.059
1.01534	6061	6154	0.654787	6706	4391	0.728914	9580	6983	1.31925	14271	18827	1.0005	20074	20084	1.015	1.319
0.580271	9580	5559	0.742071	6211	4609	0.795807	6440	5125	0.745215	14369	10708	0.99341	27163	26984	0.58	0.745
0.823361	9075	7472	0.648078	9522	6171	0.742547	17242	12803	1.03423	20769	21480	1.27505	28380	36186	0.823	1.034
0.840924	10341	8696	0.663781	13399	8894	0.673835	24552	16544	0.908719	17364	15779	0.898039	24784	22257	0.841	0.909
0.629421	10319	6495	0.634802	15315	9722	0.768119	10031	7705	1.00572	16792	16888	1.00723	24636	24814	0.629	1.006
0.775573	8466	6566	0.808824	6732	5445	0.59706	11019	6579	1.04911	25003	26231				0.776	1.049
0.816198	6643	5422	0.665376	10588	7045	0.910252	7989	7272	0.97819	14397	14083				0.816	0.978
0.584133	9063	5294	0.742062	11212	8320	0.950704	6106	5805	0.841269	14030	11803				0.584	0.841
			0.628145	10652	6691										0.704	1.107
			0.728988	10863	7919										0.752	0.932
			0.783587	14403	11286										0.655	1
			0.746316	10316	7699										0.742	0.993
			0.715668	11680	8359										0.648	1.275
			0.611888	8008	4900										0.664	0.898
			0.721448	14281	10303										0.635	1.007
															0.809
															0.665
															0.742
															0.628
															0.729
															0.784
															0.746
															0.716
															0.612
															0.721
															0.811
															0.562
															0.729
															0.796
															0.743
															0.674
															0.768
															0.597
															0.91
															0.951

## Sheet: Figure 8B statistics
Test	Treadmilling vs canonical SFs	stage 5		stage 6-7		stage 8		stage 10		stage 12
p-value (two-tailed Mann-Whitny test)	<0.0001
p-value (two-tailed Wilcoxon matched pairs signed ranks test)		0.0039		<0.0001		0.002		0.9219		0.9375
Shapiro-Wilks test of normality	stage 5 con	stage 5 exp	stage 6-7 con	stage 6-7 exp	stage 8 con	stage 8 exp	stage 10 con	stage 10 exp	stage 12 con	stage 12 exp
W	0.9482	0.9016	0.9562	0.9723	0.8796	0.8715	0.925	0.9896	0.9031	0.9427
P value	0.647	0.2283	0.5617	0.8574	0.1291	0.104	0.4002	0.9962	0.3502	0.6632
Passed normality test (alpha=0.05)?	Yes	Yes	Yes	Yes	Yes	Yes	Yes	Yes	Yes	Yes
P value summary	ns	ns	ns	ns	ns	ns	ns	ns	ns	ns
Ratio paired t-test
P value	0.0006		<0.0001		0.0003		0.6132		0.6067
t, df	t=5.205, df=9		t=17.85, df=16		t=5.576, df=9		t=0.5237, df=9		t=0.5430, df=6
Geometric mean of ratios (B / A)	0.7127		0.7008		0.7448		0.9749		1.024
SD of log(ratios)	0.08934		0.03566		0.07258		0.06655		0.05073
SEM of log(ratios)	0.02825		0.008649		0.02295		0.02105		0.01917
95% confidence interval	0.6152 to 0.8257		0.6718 to 0.7310		0.6608 to 0.8394		0.8737 to 1.088		0.9194 to 1.141
R squared (partial eta squared)	0.7507		0.9522		0.7755		0.02957		0.04684

## Sheet: Figure 8D source data
SF F-actin levels in stage 13 SFs, control and RNAi.
w1118	DAAM RNAi	Dia RNAi KK101745	Dia RNAi GD9442
22614.7	31453.7	10542.4	3628.1
12393.1	26685.2	10343	3153.2
32756.3	26881.7	13417.2	2979.2
18253.1	12997.4	17668.4	4230.4
33443.2	31923.6	16062.8	8999.4
21475.1	11548.5	10237.2	2027
19114.2	9936	4404.8	24117
24110.2	19160	2803	3637
7953.1	22937	4445.2	15725
25260.9	21414	4085.4	2443.3
25316.5	31979	10088.2	5566.5
13804.6	8185	17916.2
18475.5	6737	5805.7
19919		10553.8
23132.1		14640.5
34327		12405.2
20087		12469.5
18741		5392.6
		11622.4
		10724
		2262
		2360
		1401
		2760
		3696
		3630
		3161
		4431
		7036

## Sheet: Figure 8D statistics
Test	DAAM RNAi	Dia RNAi KK101745	Dia RNAi GD9442
p-value (two-tailed Mann-Whitney tests vs. controls)	0.7078	<0.0001	<0.0001
